# Supplementary material
Source: PubMed Central journal article supplement (PMC6113341)

### Supplemental Figure 1: Connexin 43 (Cx43) and Nav1.5 colocalize to the same discrete subcellular regions

Representative confocal micrographs of immunofluorescent (top) and proximity ligation assay (PLA; bottom) signals from isolated CPVT ventricular myocytes immunolabeled for Cx43 and Nav1.5. Across all images (n = 22) the median number of PLA punctae observed per myocyte was  $18.5 \pm 8.9$  with  $90 \pm 3\%$  being observed along the cell's periphery.

## Supplemental Figure 1

IF: Cx43 - Nav<sub>v</sub>1.5

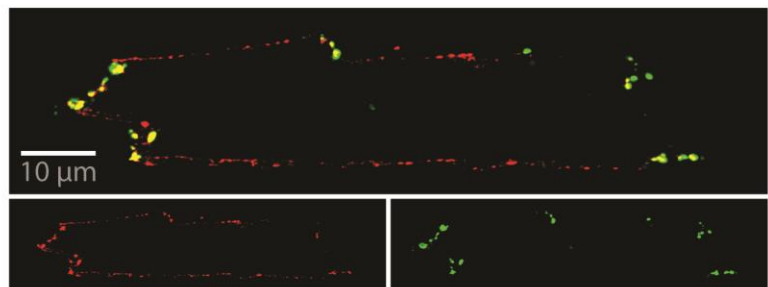

DL: Cx43 - Nav<sub>v</sub>1.5

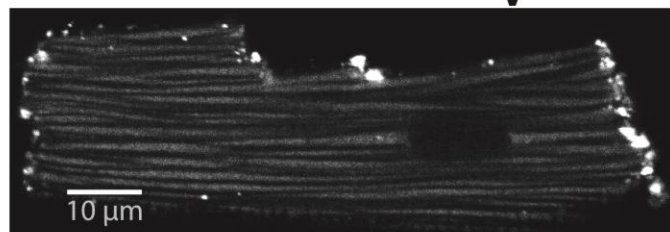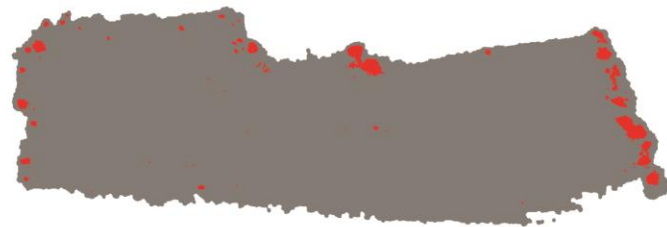

**Supplemental Figure 2:  $\beta$ -AR stimulation increases TTX-sensitive nNav-mediated persistent INa in wild type (WT).** Representative traces of persistent INa elicited using the protocol shown in the inset. ISO enhanced persistent INa in WT cardiomyocytes ( $p < 0.001$  Kruskal-Wallis test,  $n = 13$  and  $11$ , respectively,  $*p=0.006$  Wilcoxon rank-sum test). This response to ISO was completely abolished by 100nM TTX ( $n = 10$ ,  $\#p=0.003$  Wilcoxon rank-sum test).

## Supplemental Figure 2

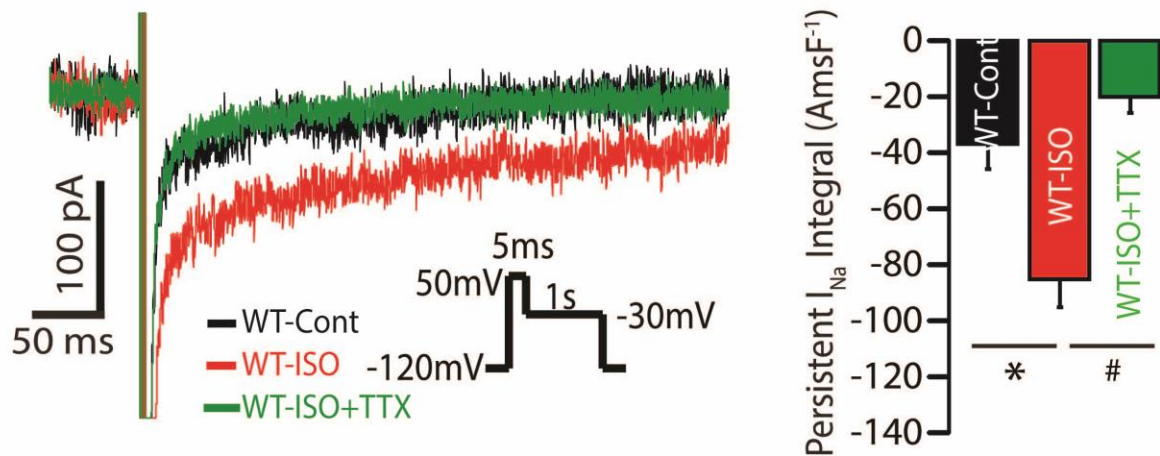

**Supplemental Figure 3: Effect of various Na<sup>+</sup> channel blockers on peak Na<sup>+</sup> current.** Inward Na<sup>+</sup> currents obtained by 200 ms depolarization steps to 0 mV in 5 mV increments at 3 sec intervals. The depolarization step is preceded by a pre-step to -140 mV from holding potential -80 mV. (Right) Corresponding peak I/V relationship for CPVT cardiomyocytes under control conditions and during exposure to riluzole (10 μM), TTX (100 nM), or flecainide (2.5 μM), (n = 14, 8, 12, 14, respectively;  $p < 0.05$  Kruskal-Wallis test,  $*p < 0.05$  Wilcoxon rank-sum test).

## Supplemental Figure 3

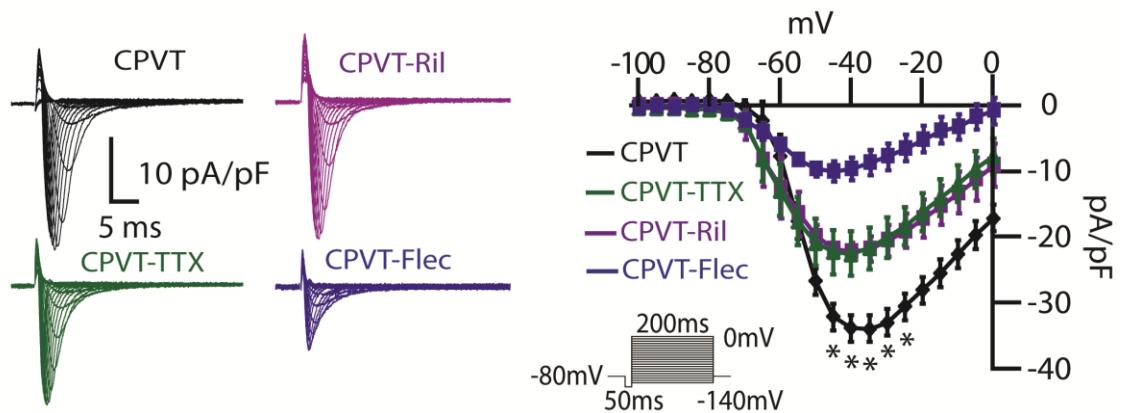

**Supplemental Figure 4: Effect of TTX-sensitive nNav-mediated persistent  $I_{Na}$  augmentation and increased SERCA2a expression on SR  $Ca^{2+}$  load. (a)** Direct augmentation of  $nNa_v$ -mediated persistent  $I_{Na}$  with  $\beta$ -PMTX (40  $\mu$ M) in CPVT myocytes exposed to ISO (100 nM) did not have a significant effect on caffeine-induced CaT amplitude ( $n = 42$  for CPVT-ISO,  $n = 31$  for CPVT-ISO+ $\beta$ -PMTX  $p=ns$  Wilcoxon rank-sum test). CPVT ventricular cardiomyocytes were loaded with  $Ca^{2+}$  indicator, Fluo-3 AM. Furthermore, none of the interventions tested had a significant effect on caffeine-induced CaT amplitude ( $n = 11$  for CPVT-ISO+ $\beta$ -PMTX+TTX,  $n = 15$  for CPVT-ISO+ $\beta$ -PMTX+Ril and  $n = 15$  for CPVT-ISO+ $\beta$ -PMTX+Flec,  $p=ns$  Kruskal-Wallis test). Likewise, CPVT-SERCA myocytes did not evidence higher caffeine-induced CaT amplitude during treatment with  $\beta$ -PMTX relative to the untreated ones ( $n = 18$  and  $17$ ,  $p=ns$  Wilcoxon rank-sum test). Importantly, CPVT-SERCA myocytes evidenced similar caffeine-induced CaT relative to CPVT myocytes treated with ISO. **(b)** Neither intervention, whether pharmacological (KN-93, 1  $\mu$ M) or genetic (S2814), had a significant effect on caffeine-induced CaT amplitude relative to ISO treated CPVT myocytes ( $n = 42$  for CPVT-ISO,  $n = 17$  for CPVT-ISO-KN93,  $n = 20$  for CPVT2814-ISO and  $n = 16$  for CPVT2814-ISO+Ril,  $p=ns$  Kruskal-Wallis test).

## Supplemental Figure 4

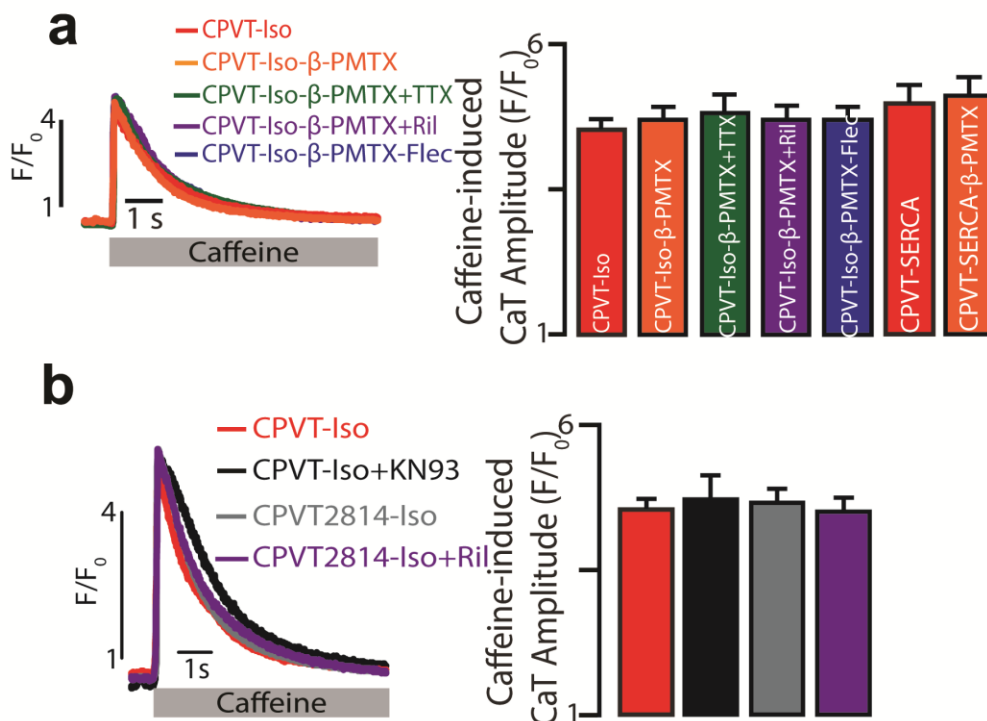

**Supplemental Figure 5: Neuronal Na<sup>+</sup> channels and RyR2 colocalize to the same discrete subcellular regions in WT ventricular myocytes.** (a) Representative confocal micrographs of ventricular myocytes isolated from WT mice showing fluorescent proximity ligation assay (PLA) signal for RyR2 with different nNav isoforms (Na<sub>v</sub>1.x). Below each image, are shown the results of digital segmentation with the cell mask in grey and PLA signal in red. (b) Plot of average number of PLA punctae per μm<sup>2</sup> (\**p*=0.002, *p*=0.009 and *p*=1 Wilcoxon rank-sum test between WT and CPVT for Na<sub>v</sub> 1.1, 1.3 and 1.6, respectively; for WT n = 3,165, 53, 2,756 punctae from 10, 6 and 8 cells for Na<sub>v</sub> 1.1, 1.3 and 1.6, respectively).

## Supplemental Figure 5

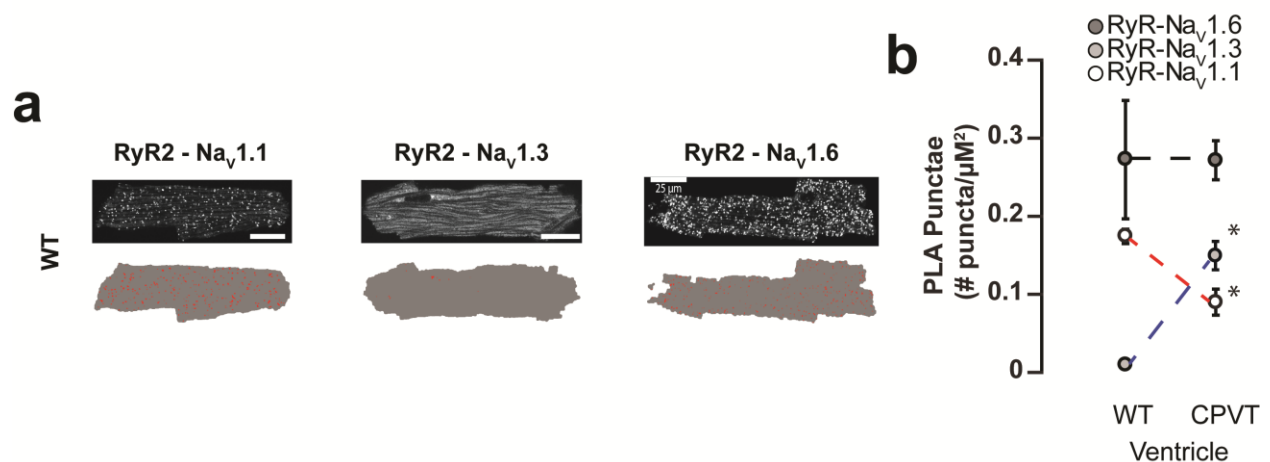

**Supplemental Figure 6: Effect of Na<sub>v</sub>1.6 blockade with 4,9-anhydro-TTX on SR Ca<sup>2+</sup> load.** Na<sub>v</sub>1.6 blockade with 4,9-anhydro-TTX (4,9ah-TTX; 300 nM) in CPVT myocytes exposed to ISO (100 nM) did not have a significant effect on caffeine-induced CaT amplitude (n = 19 for CPVT-ISO, n = 28 for CPVT-ISO+4,9ah-TTX, *p*=ns Wilcoxon rank-sum test).

## Supplemental Figure 6

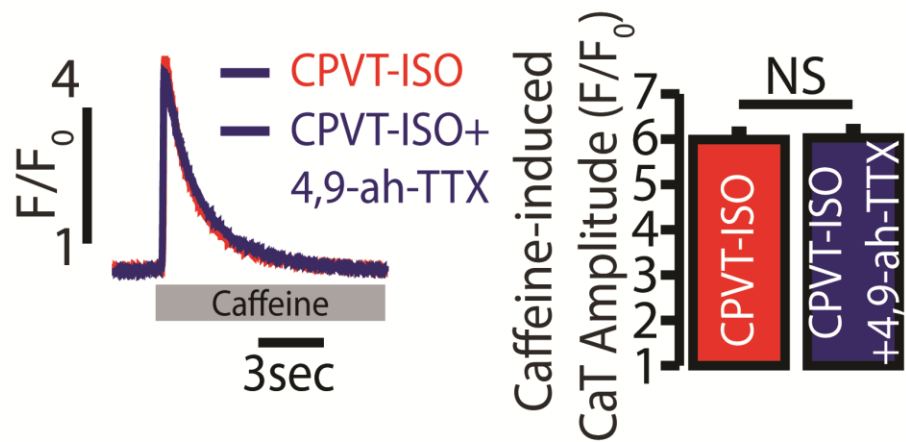

**Supplemental Figure 7: Na<sub>v</sub>1.6 silencing.** Values are reported as percentage of control (n = 3-4 hearts per group) in **(a)** and **(b)**. Decreased Na<sub>v</sub>1.6 **(a)** mRNA and **(b)** protein after siRNA treatment, respectively.

## Supplemental Figure 7

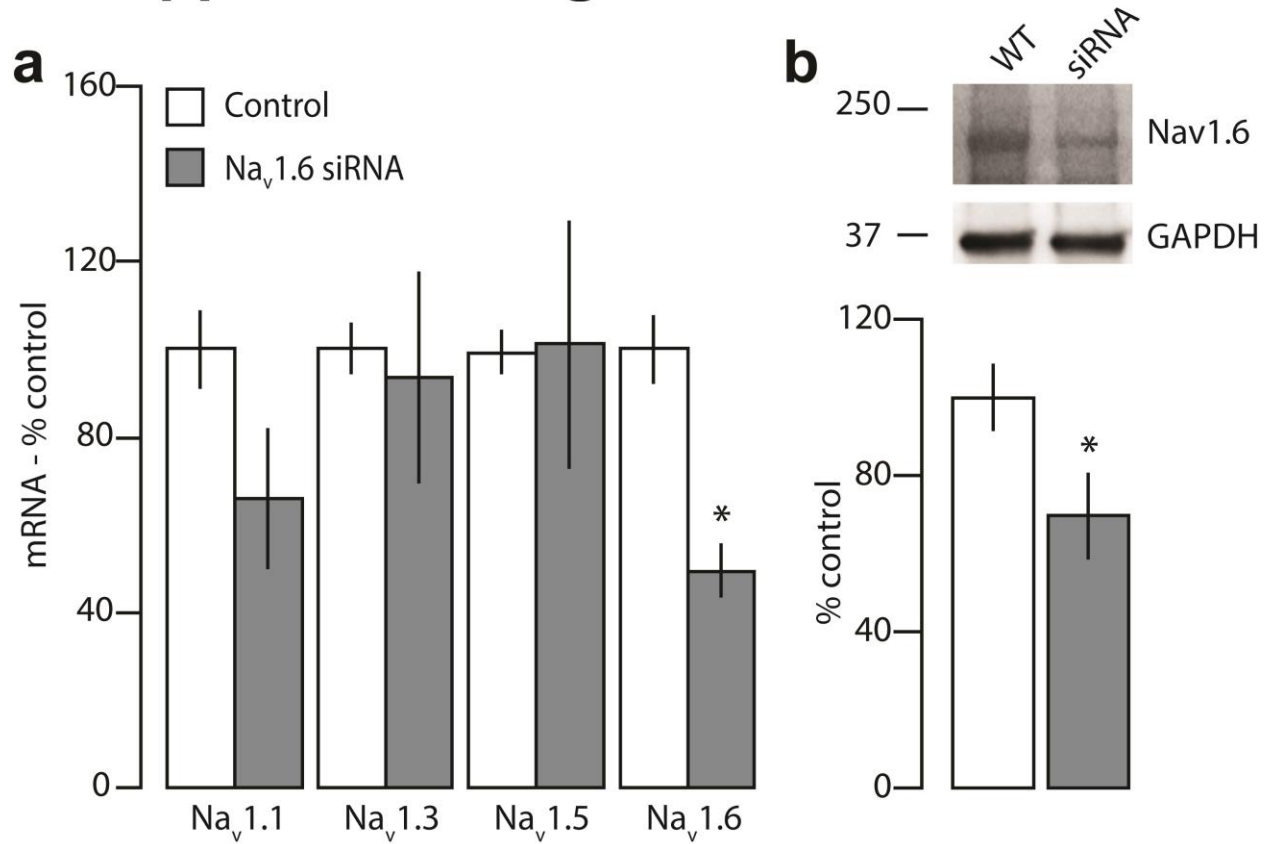

**Supplemental Figure 8: Neuronal Na<sup>+</sup> channels and NCX colocalize to the same discrete**

**subcellular regions in CPVT ventricular myocytes. (a)** Representative confocal micrographs of ventricular myocytes isolated from CPVT mice showing fluorescent proximity ligation assay (PLA) signal for NCX with different nNa<sub>v</sub> isoforms (Na<sub>v</sub>1.x). Below each image, are shown the results of digital segmentation with the cell mask in grey and PLA signal in red.

**(b)** Plot of average number of PLA punctae per μm<sup>2</sup> (*p* = 0.0195 Kruskal-Wallis test; \**p*=0.005 Wilcoxon rank-sum test for Na<sub>v</sub> 1.1vs. 1.3 and *p*=0.244 Wilcoxon rank-sum test for Na<sub>v</sub>1.1vs. 1.6. *n* = 778, 1,969, 1,526 punctae from 8, 9 and 10 cells for Na<sub>v</sub>1.1, 1.3 and 1.6, respectively).

## Supplemental Figure 8

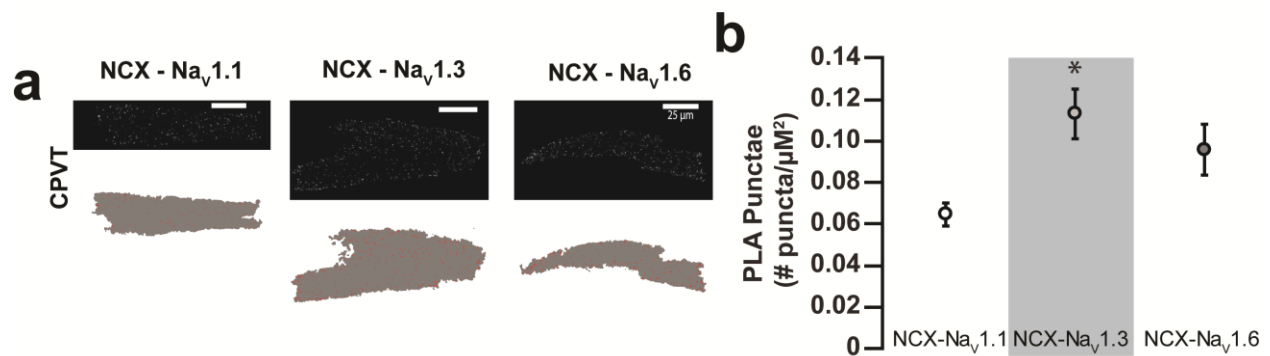

Supplement: mmc1.pdf [file mmc1.pdf]
